# Supplementary material for: Capillary pericytes mediate coronary no-reflow after myocardial ischaemia
Source: eLife journal article supplement (doi:10.7554/elife.29280), 2017-11-09
Supplement: supp [file elife-29280-supp-v1.zip]

Archive with 2 entries (2 files):
- elife_poa_e29280_Figure_3_figure_supplement_1.pdf
- elife_poa_e29280_Transparent_Reporting_File.pdf
