# Supplementary material for: Capillary pericytes mediate coronary no-reflow after myocardial ischaemia
Source: eLife journal article supplement (doi:10.7554/elife.29280), 2017-11-09
Supplement: supp [file elife-29280-supp-v1.zip]

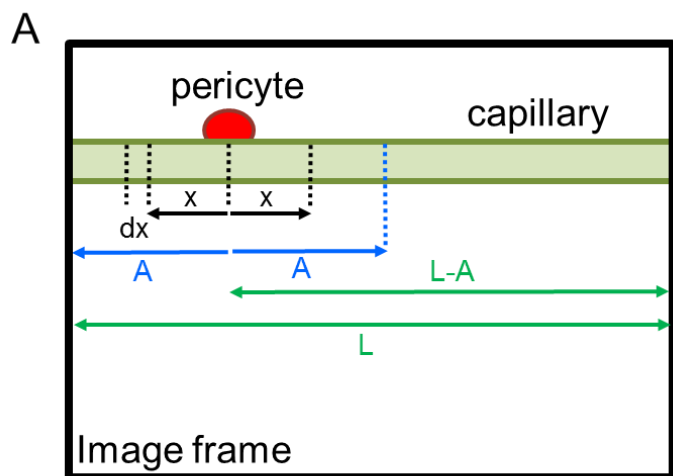

For a pericyte soma at a distance  $A$  from the frame edge, potential blockage positions are represented twice for  $x < A$ , but only once for  $A < x < L-A$ .

For a randomly positioned block, the probability of the block being between  $x$  and  $x+dx$  is:

$$2 \cdot dx/L \text{ for } x < A$$

and

$$dx/L \text{ for } A < x < L-A$$

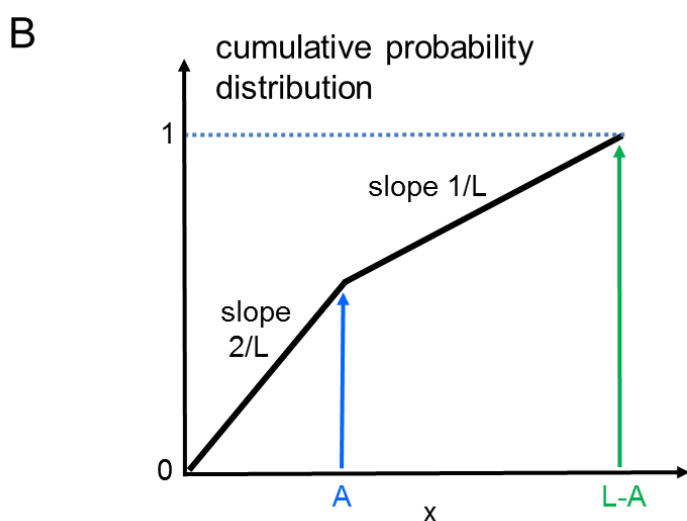

Figure 3 – figure supplement 1
